# Supplementary material for: Pharmacological analysis of zebrafish lphn3.1 morphant larvae suggests that saturated dopaminergic signaling could underlie the ADHD-like locomotor hyperactivity
Source: PubMed Central journal article supplement — Prog Neuropsychopharmacol Biol Psychiatry. 2018 Jun 8;84(Pt A):181–9. doi: 10.1016/j.pnpbp.2018.02.010 (PMC5912797; doi:10.1016/j.pnpbp.2018.02.010), 2018-06-08
Supplement: mmc1.pdf [file mmc1.pdf]

**Sup. Table 1 Determination of the habituation coefficient for control fish**

| <b>Animal</b> | <b>Locomotion before the experiment (mm)</b> | <b>Locomotion 30-40 (mm)</b> | <b>Locomotion 60-70 (mm)</b> | <b>percentage of change 30-40'(mm)</b> | <b>percentage of change 60-70'(mm)</b> |
|---------------|----------------------------------------------|------------------------------|------------------------------|----------------------------------------|----------------------------------------|
| CO1           | 3371.1                                       | 2466.4                       | 1599.9                       | -26.8                                  | -52.5                                  |
| CO2           | 2910.1                                       | 3545.1                       | 3617.7                       | 21.8                                   | 24.3                                   |
| CO3           | 2795.9                                       | 1481.9                       | 998.0                        | -47.0                                  | -64.3                                  |
| CO4           | 2738.2                                       | 2343.2                       | 2725.0                       | -14.4                                  | -0.5                                   |
| CO5           | 3210.1                                       | 4145.3                       | 916.4                        | 29.1                                   | -71.5                                  |
| CO6           | 2742.4                                       | 1201.0                       | 1504.1                       | -56.2                                  | -45.2                                  |
| CO7           | 2296.4                                       | 2658.1                       | 2183.0                       | 15.8                                   | -4.9                                   |
| CO8           | 2559.6                                       | 1266.8                       | 1437.7                       | -50.5                                  | -43.8                                  |
| CO9           | 1935.7                                       | 2431.6                       | 2568.8                       | 25.6                                   | 32.7                                   |
| CO10          | 2728.4                                       | 2301.5                       | 2363.8                       | -15.6                                  | -13.4                                  |
| CO11          | 2317.0                                       | 2676.7                       | 2571.4                       | 15.5                                   | 11.0                                   |
| CO12          | 1724.1                                       | 1223.2                       | 1417.6                       | -29.1                                  | -17.8                                  |
| CO13          | 1658.5                                       | 1714.9                       | 732.5                        | 3.4                                    | -55.8                                  |
| CO14          | 1701.5                                       | 2218.8                       | 2075.9                       | 30.4                                   | 22.0                                   |
| CO15          | 3342.5                                       | 2280.1                       | 1627.7                       | -31.8                                  | -51.3                                  |
| CO16          | 3641.7                                       | 1736.5                       | 2838.2                       | -52.3                                  | -22.1                                  |
| CO17          | 2204.3                                       | 1762.2                       | 1784.8                       | -20.1                                  | -19.0                                  |
| CO18          | 2140.1                                       | 2054.2                       | 1436.1                       | -4.0                                   | -32.9                                  |
| CO19          | 3075.5                                       | 1265.6                       | 1322.7                       | -58.8                                  | -57.0                                  |
| CO20          | 2788.4                                       | 3992.2                       | 1208.2                       | 43.2                                   | -56.7                                  |
| CO21          | 2626.3                                       | 2592.9                       | 3224.1                       | -1.3                                   | 22.8                                   |
| CO22          | 2261.8                                       | 1211.2                       | 992.2                        | -46.4                                  | -56.1                                  |
| CO23          | 3851.4                                       | 3322.9                       | 2790.1                       | -13.7                                  | -27.6                                  |
| CO24          | 2200.4                                       | 3532.4                       | 2083.6                       | 60.5                                   | -5.3                                   |
| CO25          | 2069.4                                       | 1065.7                       | 1065.6                       | -48.5                                  | -48.5                                  |
| CO26          | 3140.2                                       | 3573.3                       | 2148.0                       | 13.8                                   | -31.6                                  |
| CO27          | 1519.9                                       | 2504.3                       | 1713.9                       | 64.8                                   | 12.8                                   |
| CO28          | 2171.0                                       | 1574.7                       | 2456.1                       | -27.5                                  | 13.1                                   |
| CO29          | 2546.6                                       | 2770.3                       | 2880.2                       | 8.8                                    | 13.1                                   |
| CO30          | 2789.0                                       | 2975.5                       | 2359.0                       | 6.7                                    | -15.4                                  |
| CO31          | 2798.6                                       | 1939.1                       | 1932.6                       | -30.7                                  | -30.9                                  |
| CO32          | 2712.1                                       | 3562.6                       | 1506.6                       | 31.4                                   | -44.4                                  |
| CO33          | 2131.4                                       | 2358.5                       | 1615.8                       | 10.7                                   | -24.2                                  |
| CO34          | 2951.5                                       | 2669.2                       | 2962.9                       | -9.6                                   | 0.4                                    |
| CO35          | 2843.0                                       | 2381.2                       | 2091.8                       | -16.2                                  | -26.4                                  |
| CO36          | 3238.7                                       | 3186.5                       | 2801.4                       | -1.6                                   | -13.5                                  |
| CO37          | 1698.1                                       | 1872.6                       | 3290.7                       | 10.3                                   | 93.8                                   |
| CO38          | 2628.6                                       | 3122.8                       | 2585.2                       | 18.8                                   | -1.7                                   |
| CO39          | 2329.4                                       | 2732.6                       | 2370.8                       | 17.3                                   | 1.8                                    |
|               |                                              |                              | <b>Mean</b>                  | <b>-4.5</b>                            | <b>-17.6</b>                           |
|               |                                              |                              | <b>SEM</b>                   | <b>6.4</b>                             | <b>5.3</b>                             |

**Sup. Table2 Example of calculations to (i) adjust the distance swum after treatment and (ii) obtain the percentage of change in activity. The value used is for animal CO1 treated with 10uM Apomorphine, for 30-40mn (cf table 3 / coeff of habituation = 0.045).**

|                                   |                             | 30-40mn                |                                                                |                                                         |
|-----------------------------------|-----------------------------|------------------------|----------------------------------------------------------------|---------------------------------------------------------|
| Animal                            | locomotion before treatment | locomotion at 30-40 mn | locomotion at 30-40 mn adjusted with the coeff. of habituation | Percentage of change in activity                        |
| CO1 treated with 10uM Apomorphine | 1560.2mm                    | 1561.5mm               | $1561.5 + (1561.5 \times 0.045) = 1631.8$                      | $\frac{(1631.8 - 1560.2) \times 100}{1560.2} = 4.59 \%$ |

**Sup. Table 3. Illustration of the different values for control-injected animals treated with 10uM Apomorphine. time window 30-40mn**

| <b>Animal</b> | <b>locomotion before treatment (mm)</b> | <b>locomotion 30-40mn (mm)</b> | <b>locomotion 30-40 mn adjusted (mm)</b> | <b>30-40mn percentage of change in activity</b> |
|---------------|-----------------------------------------|--------------------------------|------------------------------------------|-------------------------------------------------|
| CO1           | 1560.20                                 | 1561.50                        | 1631.77                                  | 4.59                                            |
| CO2           | 3049.20                                 | 2141.40                        | 2237.76                                  | -26.61                                          |
| CO3           | 1852.30                                 | 2555.30                        | 2670.29                                  | 44.16                                           |
| CO4           | 2289.90                                 | 45.60                          | 47.65                                    | -97.92                                          |
| CO5           | 1896.90                                 | 1865.50                        | 1949.45                                  | 2.77                                            |
| CO6           | 3079.90                                 | 3718.70                        | 3886.04                                  | 26.17                                           |
| CO7           | 3182.10                                 | 3033.30                        | 3169.80                                  | -0.39                                           |
| CO8           | 1661.40                                 | 1778.50                        | 1858.53                                  | 11.87                                           |
| CO9           | 2699.40                                 | 1471.00                        | 1537.20                                  | -43.05                                          |
| CO10          | 2659.20                                 | 1083.00                        | 1131.74                                  | -57.44                                          |
| CO11          | 1638.10                                 | 1890.10                        | 1975.15                                  | 20.58                                           |
| CO12          | 1527.00                                 | 589.00                         | 615.51                                   | -59.69                                          |
| CO13          | 2748.30                                 | 1196.70                        | 1250.55                                  | -54.50                                          |
| CO14          | 3677.70                                 | 1034.50                        | 1081.05                                  | -70.61                                          |
| CO15          | 1545.60                                 | 1446.30                        | 1511.38                                  | -2.21                                           |
| CO16          | 2808.60                                 | 1095.30                        | 1144.59                                  | -59.25                                          |
| CO17          | 1771.90                                 | 274.50                         | 286.85                                   | -83.81                                          |
| CO18          | 3238.50                                 | 4315.20                        | 4509.38                                  | 39.24                                           |
| CO19          | 3084.80                                 | 2911.20                        | 3042.20                                  | -1.38                                           |
| CO20          | 3692.60                                 | 3021.60                        | 3157.57                                  | -14.49                                          |
| CO21          | 3060.60                                 | 1519.40                        | 1587.77                                  | -48.12                                          |
| CO22          | 3407.20                                 | 1083.50                        | 1132.26                                  | -66.77                                          |
| CO23          | 3331.30                                 | 1758.40                        | 1837.53                                  | -44.84                                          |
| CO24          | 3188.50                                 | 2601.20                        | 2718.25                                  | -14.75                                          |
|               |                                         |                                | <b>Mean</b>                              | <b>-24.85</b>                                   |
|               |                                         |                                | <b>SEM</b>                               | <b>7.98</b>                                     |

**Supp. Table 4 mean distance swum per fish before and after Apomorphine treatment (in mm).  
30-40/60-70 are mean adjusted distances**

|                         |  | Apomorphine |         |         |         |         |
|-------------------------|--|-------------|---------|---------|---------|---------|
|                         |  | CO          |         |         |         |         |
|                         |  | 10µm        | 32.5µm  | 65µm    | 100µm   | 150µm   |
| <b>Before Treatment</b> |  | 2610.47     | 2437.68 | 2283.85 | 2089.18 | 2370.08 |
| <b>10-20</b>            |  | 1876.82     | 1407.31 | 2705.11 | 1549.39 | 1260.81 |
| <b>30-40</b>            |  | 1915.43     | 1496.05 | 1579.89 | 838.95  | 1335.50 |
| <b>60-70</b>            |  | 1641.17     | 1534.41 | 1483.53 | 1002.24 | 620.60  |
|                         |  | MO          |         |         |         |         |
|                         |  | 10µm        | 32.5µm  | 65µm    | 100µm   | 150µm   |
| <b>Before Treatment</b> |  | 2388.57     | 2593.05 | 2538.86 | 2028.34 | 2104.11 |
| <b>10-20</b>            |  | 2075.63     | 1970.37 | 3021.95 | 1978.25 | 2061.61 |
| <b>30-40</b>            |  | 2154.38     | 2132.67 | 1762.68 | 1627.60 | 1713.11 |
| <b>60-70</b>            |  | 1856.42     | 1574.93 | 2008.94 | 918.34  | 930.85  |

**Supp. Table 5 mean distance swum per fish before and after SKF38393 treatment (in mm).  
30-40/60-70 are mean adjusted distances**

|                         |  | SKF38393 |         |         |         |         |
|-------------------------|--|----------|---------|---------|---------|---------|
|                         |  | CO       |         |         |         |         |
|                         |  | 1µm      | 5µm     | 10µm    | 15µm    | 20µm    |
| <b>Before Treatment</b> |  | 2318.28  | 2020.94 | 2186.46 | 2138.36 | 2466.22 |
| <b>10-20</b>            |  | 2932.42  | 2298.68 | 2371.43 | 2533.18 | 2776.28 |
| <b>30-40</b>            |  | 2748.29  | 2527.48 | 2600.08 | 2660.86 | 2622.77 |
| <b>60-70</b>            |  | 2045.20  | 2084.12 | 2028.42 | 2394.16 | 2136.24 |
|                         |  | MO       |         |         |         |         |
|                         |  | 1µm      | 5µm     | 10µm    | 15µm    | 20µm    |
| <b>Before Treatment</b> |  | 2231.65  | 2620.37 | 2280.96 | 2541.15 | 2220.12 |
| <b>10-20</b>            |  | 3135.88  | 2456.21 | 2353.52 | 3006.76 | 2565.75 |
| <b>30-40</b>            |  | 3104.90  | 2892.92 | 2525.68 | 3144.78 | 2621.98 |
| <b>60-70</b>            |  | 2217.04  | 2420.34 | 2006.25 | 2540.88 | 2009.64 |

**Supp. Table 6 mean distance swum per fish before and after Quinpirole treatment (in mm).  
30-40/60-70 are mean adjusted distances**

|                         |  | Quinpirole |         |         |         |         |
|-------------------------|--|------------|---------|---------|---------|---------|
|                         |  | CO         |         |         |         |         |
|                         |  | 1µm        | 15µm    | 20µm    | 30µm    | 50µm    |
| <b>Before Treatment</b> |  | 2211.43    | 2541.67 | 2224.69 | 2570.03 | 2158.96 |
| <b>10-20</b>            |  | 2116.20    | 1758.52 | 1985.03 | 1661.22 | 1684.58 |
| <b>30-40</b>            |  | 1946.53    | 1907.74 | 1764.78 | 1544.80 | 1801.86 |
| <b>60-70</b>            |  | 1610.04    | 2202.59 | 1968.67 | 1735.60 | 1907.46 |
|                         |  | MO         |         |         |         |         |
|                         |  | 1µm        | 5µm     | 10µm    | 30µm    | 50µm    |
| <b>Before Treatment</b> |  | 2513.74    | 2564.45 | 2589.56 | 2410.21 | 2738.48 |
| <b>10-20</b>            |  | 2654.45    | 2104.76 | 1876.04 | 1823.71 | 2212.19 |
| <b>30-40</b>            |  | 2627.42    | 2217.59 | 2320.64 | 2077.48 | 2379.13 |
| <b>60-70</b>            |  | 2357.20    | 2514.81 | 2612.41 | 2123.47 | 2698.29 |

**Supp. Table 7 mean distance swum per fish before and after Haloperidol treatment (in mm). 30-40/60-70 are mean adjusted distances**

|                         | Haloperidol |         |         |         |
|-------------------------|-------------|---------|---------|---------|
|                         | CO          |         |         |         |
|                         | 1µm         | 5µm     | 10µm    | 20µm    |
| <b>Before Treatment</b> | 2410.25     | 2435.91 | 1972.75 | 1550.12 |
| <b>10-20</b>            | 2495.89     | 2467.85 | 2564.28 | 2119.34 |
| <b>30-40</b>            | 2448.40     | 2711.46 | 2463.92 | 1912.19 |
| <b>60-70</b>            | 2358.69     | 2551.24 | 2553.72 | 1875.61 |
|                         | MO          |         |         |         |
|                         | CO          |         |         |         |
|                         | 1µm         | 5µm     | 10µm    | 20µm    |
| <b>Before Treatment</b> | 2269.37     | 2447.74 | 2397.77 | 2531.15 |
| <b>10-20</b>            | 2551.22     | 2561.52 | 3001.29 | 3290.56 |
| <b>30-40</b>            | 2464.59     | 2838.81 | 3010.68 | 3355.34 |
| <b>60-70</b>            | 1977.47     | 2389.37 | 2329.24 | 2420.04 |

**Supp. Table 8 mean distance swum per fish before and after SCH23390 treatment (in mm). 30-40/60-70 are mean adjusted distances**

|                         | SCH23390 |         |         |         |         |
|-------------------------|----------|---------|---------|---------|---------|
|                         | CO       |         |         |         |         |
|                         | 1µm      | 5µm     | 10µm    | 20µm    | 30µm    |
| <b>Before Treatment</b> | 2033.54  | 2056.98 | 2457.15 | 2084.38 | 2267.33 |
| <b>10-20</b>            | 2253.91  | 2027.65 | 2195.46 | 1874.27 | 1773.81 |
| <b>30-40</b>            | 1885.47  | 1530.68 | 1445.52 | 1616.73 | 1568.89 |
| <b>60-70</b>            | 1574.15  | 1222.36 | 1147.20 | 1466.90 | 1606.35 |
|                         | MO       |         |         |         |         |
|                         | CO       |         |         |         |         |
|                         | 1µm      | 5µm     | 10µm    | 20µm    | 30µm    |
| <b>Before Treatment</b> | 2273.67  | 2262.99 | 2554.83 | 2504.18 | 2273.29 |
| <b>10-20</b>            | 2491.35  | 2249.54 | 2564.77 | 2630.29 | 1919.63 |
| <b>30-40</b>            | 2288.06  | 2464.37 | 2436.59 | 2725.39 | 1988.86 |
| <b>60-70</b>            | 1882.70  | 1823.63 | 2077.78 | 2397.80 | 2418.78 |

**Supp. Table 9 mean distance swum per fish before and after Eticlopride treatment (in mm). 30-40/60-70 are mean adjusted distances**

|                         | Eticlopride |         |         |         |
|-------------------------|-------------|---------|---------|---------|
|                         | CO          |         |         |         |
|                         | 1µm         | 5µm     | 10µm    | 20µm    |
| <b>Before Treatment</b> | 2411.23     | 2183.67 | 2146.30 | 2222.26 |
| <b>10-20</b>            | 2467.64     | 2310.98 | 1764.25 | 882.39  |
| <b>30-40</b>            | 2431.44     | 1655.12 | 876.17  | 748.65  |
| <b>60-70</b>            | 2206.80     | 1252.31 | 948.60  | 268.54  |
|                         | MO          |         |         |         |
|                         | CO          |         |         |         |
|                         | 1µm         | 5µm     | 10µm    | 20µm    |
| <b>Before Treatment</b> | 2167.93     | 2380.14 | 2473.96 | 2534.37 |
| <b>10-20</b>            | 2564.56     | 2529.98 | 2167.21 | 1211.51 |
| <b>30-40</b>            | 2859.39     | 2377.94 | 1312.30 | 770.01  |
| <b>60-70</b>            | 2429.26     | 1770.22 | 1335.34 | 217.99  |
